# Supplementary material
Source: Springer Nature journal article supplement (https://www.springermedizin.de/resource/supplementary/12885_2008_1417_MOESM7_ESM.pdf/9473086)

# TAC1 expression

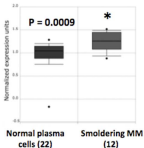

Zhan et al. *Blood* 2007

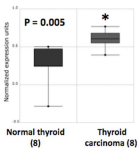

Huang et al. *Proc. Natl. Acad. Sci.* 2001

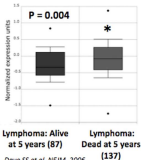

Dave SS et al. *NCMJ*, 2006

Supplement: MOESM7 [file 9473086]
